# Supplementary material
Source: PubMed Central journal article supplement (PMC554118)
Supplement: 7600560s1.pdf [file 7600560s1.pdf]

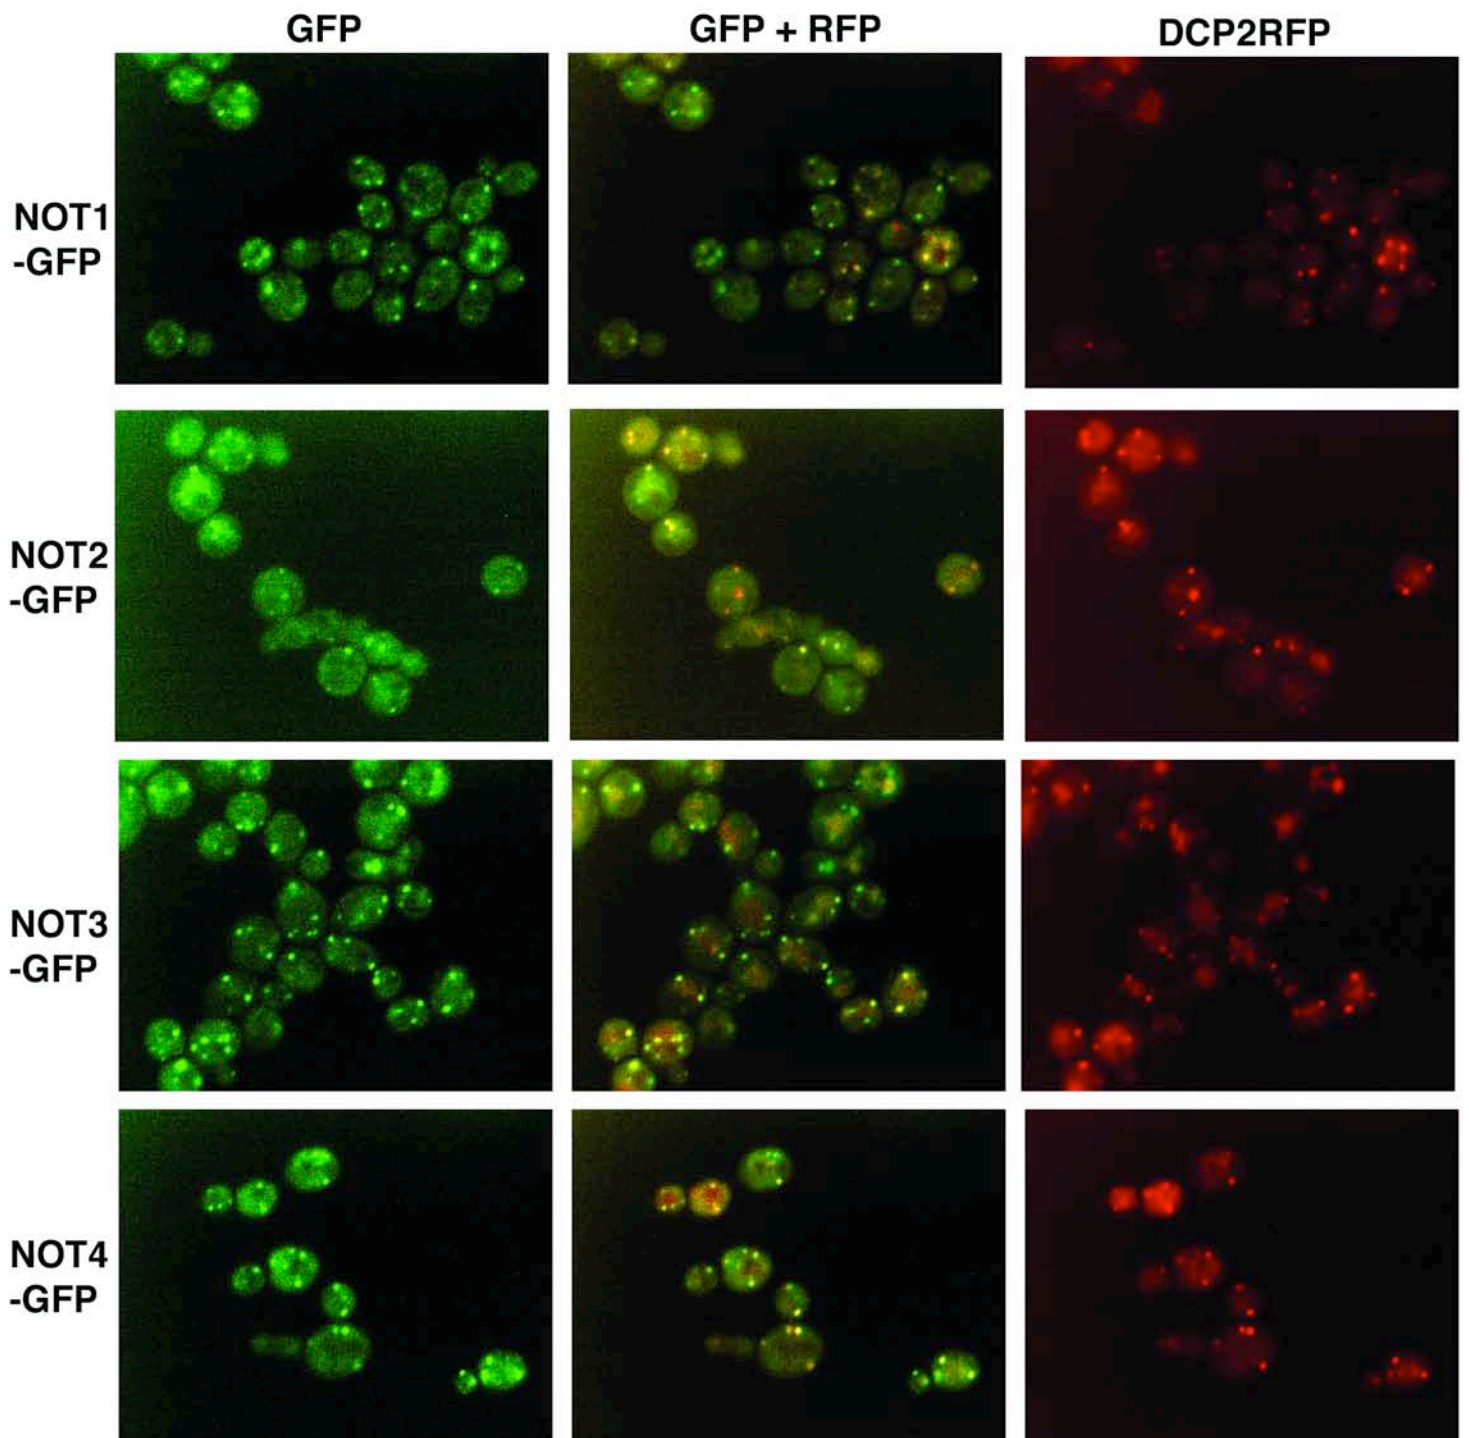

**Supplementary Figure 1: Not Proteins and Dcp2p co-localize in a dcp1 $\Delta$  strain.**

Left panels show the NOT1-4-GFP proteins in green(dcp1 $\Delta$  strains: not1=yRP1915; not2=yRP1916; not3=yRP1917; not4=yRP1918). Right panels show the DCP2-RFP protein(pRP1166) in red. Center panels are the overlay of the images showing the co-localization in yellow. Each series is from a single 0.5 $\mu$  plane through the yeast cell. All pictures were taken at identical gain and normalization settings.
